# Supplementary material for: Breaking the Hoff/Le Bel rule by an electron-compensation strategy: the global energy minimum of NGa4S4+
Source: Royal Society of Chemistry journal article supplement (doi:10.1039/d3cp05290g), 2024-01-01
Supplement: d3cp05290g1.pdf [file d3cp05290g1.pdf]

## Electronic Supplementary Information

### Breaking Hoff/Le Bel Rule by Electron-compensation Strategy: the global minimum of $\text{NGa}_4\text{S}_4^+$

Xiu-dong Jia, <sup>\*a</sup> and Zhi-wei Du <sup>b</sup>

- a. Institute of Molecular Science, Shanxi University, Taiyuan, Shanxi, 030006, People's Republic of China.
- b. School of Chemistry and Chemical Engineering, Shanxi University, Taiyuan, Shanxi, 030006, People's Republic of China.

\* To whom correspondence should be addressed

Email: [202012801006@email.sxu.edu.cn](mailto:202012801006@email.sxu.edu.cn) (Xiu-dong Jia)

## Contents

### SI-1

**Fig. S1** Structures and relative energies ( $\Delta E$ , in kcal mol<sup>-1</sup> at the CCSD(T) + ZPEB2PLYP-D3(BJ) level) of **0a** and its low-energy isomers.

**Fig. S2** AdNDP bonding patterns of **0a** with occupation numbers (ONs).

**Fig. S3** The RMSD plots for the BOMD simulations of **1c** at 4 K, 298 K, 500 K and 1000 K, respectively.

### SI-2

Cartesian Coordinates of the B2PLYP-D3(BJ)/aug-cc-pVTZ-optimized structures shown in **Fig. 2** and **S1**.

## SI-1

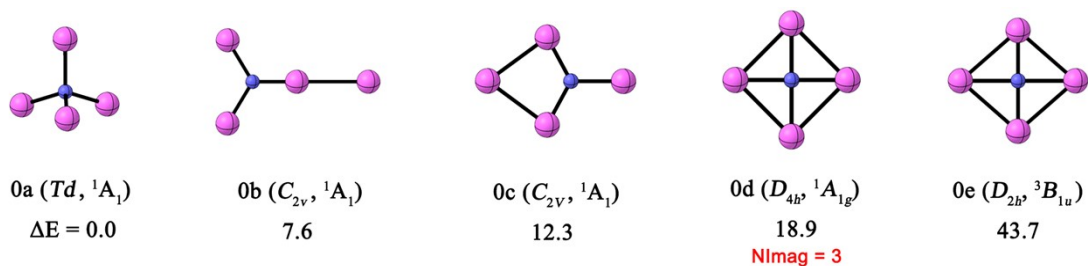

**Fig. S1** Structures and relative energies ( $\Delta E$ , in kcal mol<sup>-1</sup> at the CCSD(T) + ZPE<sub>B2PLYP-D3(BJ)</sub> level) of **0a** and its low-energy isomers.

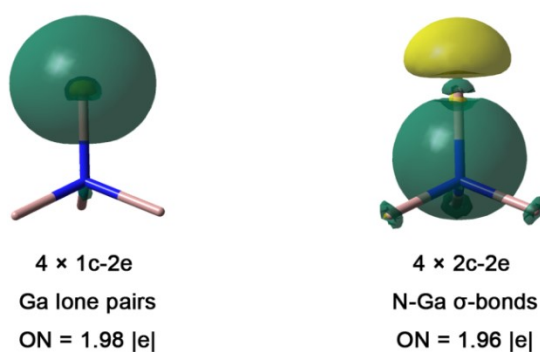

**Fig. S2** AdNDP bonding patterns of **0a** with occupation numbers (ONs).

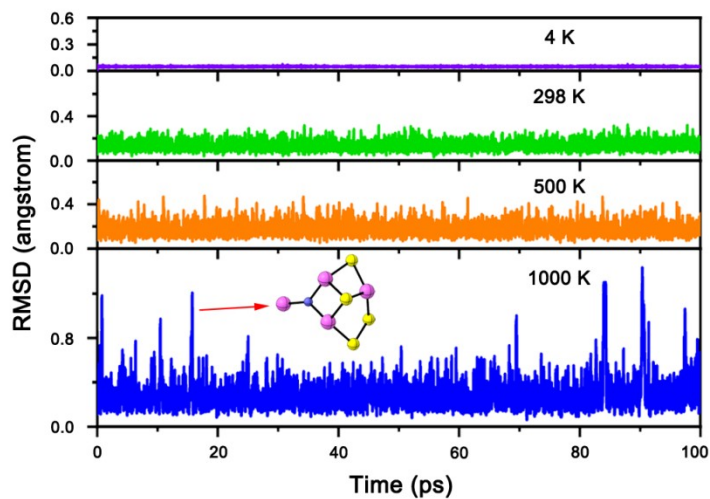

**Fig. S3** The RMSD plots for the BOMD simulations of **1c** at 4 K, 298 K, 500 K and 1000 K, respectively.

## SI-2

Cartesian Coordinates of the B2PLYP-D3(BJ)/aug-cc-pVTZ-optimized structures shown in **Fig. 2**

### 1a

|    |             |             |            |
|----|-------------|-------------|------------|
| N  | 0.00000000  | 0.00000000  | 0.00000000 |
| Ga | 0.00000000  | 1.93735900  | 0.00000000 |
| Ga | 1.93735900  | 0.00000000  | 0.00000000 |
| Ga | 0.00000000  | -1.93735900 | 0.00000000 |
| Ga | -1.93735900 | 0.00000000  | 0.00000000 |
| S  | 2.21177700  | -2.21177700 | 0.00000000 |
| S  | 2.21177700  | 2.21177700  | 0.00000000 |
| S  | -2.21177700 | 2.21177700  | 0.00000000 |
| S  | -2.21177700 | -2.21177700 | 0.00000000 |

### 1b

|    |             |             |             |
|----|-------------|-------------|-------------|
| N  | 1.13320300  | -2.44207700 | -0.40960800 |
| S  | -2.58382000 | -1.41271500 | -0.57286800 |
| S  | -1.04335300 | 2.45762800  | -0.86947200 |
| S  | 2.81214600  | 1.07652300  | -0.22317400 |
| S  | -0.41710500 | 0.16600600  | 1.67811000  |
| Ga | -1.95928100 | 0.62798700  | 0.01660500  |
| Ga | -0.48999400 | -1.80996600 | 0.08792800  |
| Ga | 2.15300200  | -1.01088400 | -0.23974600 |
| Ga | 0.67632800  | 1.56368500  | 0.22120300  |

### 1c

|    |             |             |             |
|----|-------------|-------------|-------------|
| N  | 0.46029500  | 0.68428600  | -0.19170200 |
| Ga | 1.17920800  | 2.46789700  | -0.80850500 |
| Ga | -0.92242000 | 0.49571400  | 1.19113000  |
| Ga | 1.44988800  | -0.77981300 | 0.73312800  |

|    |             |             |             |
|----|-------------|-------------|-------------|
| Ga | -0.14123700 | -0.72535000 | -1.40478600 |
| S  | -2.32851800 | -1.03392000 | -1.12518000 |
| S  | -2.87544000 | 0.59606000  | 0.13384600  |
| S  | 1.59722200  | -2.11546000 | -1.03947600 |
| S  | 0.37231800  | -0.57179800 | 2.67468200  |

### 1d

|    |             |             |            |
|----|-------------|-------------|------------|
| N  | 0.00000000  | 0.16577400  | 0.00000000 |
| Ga | 1.78520300  | 0.78887400  | 0.00000000 |
| Ga | -0.09117800 | 2.26426400  | 0.00000000 |
| Ga | -0.05111300 | -1.73772000 | 0.00000000 |
| Ga | -1.96115000 | 0.20429100  | 0.00000000 |
| S  | -2.31734500 | 2.39276900  | 0.00000000 |
| S  | -2.28684600 | -1.97331200 | 0.00000000 |
| S  | 1.98494500  | -2.57924600 | 0.00000000 |
| S  | 3.23583200  | -0.85717500 | 0.00000000 |

### 1e

|    |             |             |             |
|----|-------------|-------------|-------------|
| N  | -0.75876300 | -0.54972100 | 0.69224100  |
| Ga | -3.27311800 | -1.03025300 | -0.58095700 |
| Ga | -1.38501500 | 1.25343900  | 0.33509600  |
| Ga | 4.60044300  | 0.05529300  | -0.40948200 |
| Ga | 1.10605400  | -0.11155600 | 0.26401200  |
| S  | -1.64100900 | -1.93500900 | 0.74463500  |
| S  | 2.74109400  | -1.44508100 | 0.02001000  |
| S  | -3.43461200 | 1.20768000  | -0.46499200 |
| S  | 0.63528200  | 2.08949900  | 0.15569300  |

Cartesian Coordinates of the B2PLYP-D3(BJ)/aug-cc-pVTZ-optimized structures shown in **Fig. S1**.

**0a**

|    |             |             |             |
|----|-------------|-------------|-------------|
| N  | 0.00000000  | 0.00000000  | 0.00000000  |
| Ga | 1.20472300  | 1.20472300  | 1.20472300  |
| Ga | -1.20472300 | -1.20472300 | 1.20472300  |
| Ga | 1.20472300  | -1.20472300 | -1.20472300 |
| Ga | -1.20472300 | 1.20472300  | -1.20472300 |

**0b**

|    |            |             |             |
|----|------------|-------------|-------------|
| N  | 0.00000000 | 0.00000000  | -1.06264900 |
| Ga | 0.00000000 | 0.00000000  | 3.65664000  |
| Ga | 0.00000000 | 1.70454900  | -2.07907100 |
| Ga | 0.00000000 | 0.00000000  | 0.74145500  |
| Ga | 0.00000000 | -1.70454900 | -2.07907100 |

**0c**

|    |            |             |             |
|----|------------|-------------|-------------|
| N  | 0.00000000 | 0.00000000  | 0.70630400  |
| Ga | 0.00000000 | 0.00000000  | 2.72737100  |
| Ga | 0.00000000 | 0.00000000  | -2.48075200 |
| Ga | 0.00000000 | 1.66599200  | -0.20305400 |
| Ga | 0.00000000 | -1.66599200 | -0.20305400 |

**0d**

|    |             |             |            |
|----|-------------|-------------|------------|
| N  | 0.00000000  | 0.00000000  | 0.00000000 |
| Ga | 0.00000000  | 2.10267600  | 0.00000000 |
| Ga | 2.10267600  | 0.00000000  | 0.00000000 |
| Ga | 0.00000000  | -2.10267600 | 0.00000000 |
| Ga | -2.10267600 | 0.00000000  | 0.00000000 |

**0e**

|    |            |             |             |
|----|------------|-------------|-------------|
| N  | 0.00000000 | 0.00000000  | 0.00000000  |
| Ga | 0.00000000 | 0.00000000  | 2.22313000  |
| Ga | 0.00000000 | 1.93363100  | 0.00000000  |
| Ga | 0.00000000 | 0.00000000  | -2.22313000 |
| Ga | 0.00000000 | -1.93363100 | 0.00000000  |
